# Supplementary material for: Fish oil supplementation inhibits endoplasmic reticulum stress and improves insulin resistance: involvement of AMP-activated protein kinase
Source: Royal Society of Chemistry journal article supplement (doi:10.1039/c6fo01841f), 2017-01-01
Supplement: c6fo01841f1.pdf [file c6fo01841f1.pdf]

**Supplemental Table 1** Primer sequences used for qRT-PCR.

| Gene                            | Forward primer (5' to 3') | Reverse primer (5' to 3')   |
|---------------------------------|---------------------------|-----------------------------|
| <i>EDEM</i>                     | CTGCCTACACGCCTTCTACTATG   | TGGTTGCCTGGTAGAGGAGATA      |
| <i>GRP78</i>                    | GTTTGCTGAGGAAGACAAAAAGCTC | CACTTCCATAGAGTTTGCTGATAATTG |
| <i>ERdj4</i>                    | CTTAGGTGTGCCAAAGTCTGC     | GGCATCCGAGAGTGTTTCATA       |
| <i>leptin</i>                   | TCGGTATCCGCCAAGCA         | GGTGAAGCCCAGCAATGAAG        |
| <i>adiponectin</i>              | ACAGGAGATGTTGGAATGACAG    | CTGCCGTCATAATGATTCTGTT      |
| <i>resistin</i>                 | TCATTTCCCCTCCTTTTCCTTT    | TGGGACACAGTGGCATGCT         |
| <i>Glut4</i>                    | GACGGACACTCCATCTGTTG      | GCCACGATGGAGACATAGC         |
| <i>IRS1</i>                     | CCAGAGTCAAGCCTCACACA      | CCCAACTCAACTCCACCACT        |
| <i>TNF<math>\alpha</math></i>   | GCTACGACGTGGGCTACA        | CCCTCACACTCAGATCATCTTCT     |
| <i>IL-6</i>                     | AGTTGCCTTCTTGGGACTGA      | ACAGGTCTGTTGGGAGTGGT        |
| <i>MCP-1</i>                    | CCCAATGAGTAGGCTGGAGA      | TCTGGACCCATTCTTCTTG         |
| <i>CD68</i>                     | CCAATTCAGGGTGAAGAAA       | CTCGGGCTCTGATGTAGGTC        |
| <i>F4/80</i>                    | CTTGGCTATGGGCTTCCAGTC     | GCAAGGAGGACAGAGTTTATCGTG    |
| <i><math>\beta</math>-Actin</i> | CGTGAAAAGATGACCCAGATCA    | CAGCCTGGATGGCTACGTACA       |
